# Supplementary material for: Cholesterol and Alzheimer’s Disease Risk: A Meta-Meta-Analysis
Source: PubMed Central journal article supplement (PMC7349210; doi:10.3390/brainsci10060386), 2020-06-18
Supplement: brainsci-10-00386-s001.pdf [file brainsci-10-00386-s001.pdf]

## Supplementary material

**Table 1.** Characteristics of studies included in the meta-analysis

| Study (N = 100)                      | Year | Country   | n   | Cases  |              | Controls |        |               |
|--------------------------------------|------|-----------|-----|--------|--------------|----------|--------|---------------|
|                                      |      |           |     | % F    | Age          | n        | % F    | Age           |
| <b>Zhou et al. [33]</b>              |      |           |     |        |              |          |        |               |
| 1. Ban et al. [57] *                 | 2009 | Japan     | 197 | 59.90  | 80 ± 1       | 47       | 38.30  | 75 ± 1        |
| 2. Cacabelos et al. [58]             | 2003 | Spain     | 147 | -      | 71.73 ± 9.61 | 109      | -      | 50.20 ± 12.06 |
| 3. Caramelli et al. [59]             | 1999 | Brazil    | 24  | -      | 67.2 ± 10.6  | 32       | 59.38  | 68.2 ± 10.6   |
| 4. Chen et al. [60]                  | 2019 | China     | 117 | 52.14  | 67.64 ± 6.65 | 117      | 62.39  | 66.06 ± 6.00  |
| 5. Hoshino, Kamino, Matsumoto [61] * | 2002 | Japan     | 82  | 71.95  | 77.0 ± 6.8   | 40       | 67.50  | 84.2 ± 3.1    |
| 6. Kouzuki et al. [62]               | 2018 | Japan     | 42  | 61.90  | 80.5 ± 5.7   | 18       | 72.22  | 75.6 ± 5.5    |
| 7. Kuo et al. [63] *                 | 1998 | America   | 64  | -      | 81.6 ± 0.9   | 36       | -      | 78.7 ± 1.3    |
| 8. Lehtonen, Luutonen [64]           | 1986 | Finland   | 22  | 100.00 | ≥90          | 23       | 100.00 | ≥90           |
| 9. Lesser et al. [65]                | 2001 | America   | 44  | -      | 87.0 ± 8.5   | 22       | -      | 82.0 ± 7      |
| 10. Macesic et al. [66]              | 2017 | Serbia    | 62  | 70.97  | 73.1 ± 5.8   | 40       | 50.00  | 68.4 ± 5.5    |
| 11. Mamo et al. [67]                 | 2008 | Australia | 10  | -      | 79.2 ± 1.8   | 10       | -      | 80.5 ± 1.5    |
| 12. Moroney et al. [45]              | 1999 | America   | 225 | 72.00  | 77.7 ± 6.3   | 764      | 67.54  | 74.1 ± 5.5    |
| 13. Panza et al. [68]                | 2003 | Italy     | 49  | 69.39  | 71.6 ± 9.3   | 45       | 71.11  | 65.8 ± 11.6   |
| 14. Paragh et al. [69]               | 2002 | Hungary   | 30  | 66.67  | 64.3 ± 11.7  | 40       | 65.00  | 72.3 ± 9.6    |
| 15. Reitz et al. [37]                | 2004 | America   | 244 | 77.46  | 82.85 ± 7.3  | 2226     | 65.86  | 76.42 ± 6.3   |
| 16. Ryglewicz et al. [70]            | 2002 | Poland    | 26  | -      | 67 ± 8.4     | 46       | -      | 67.5 ± 6.9    |
| 17. Scacchi et al. [71]              | 1998 | Italy     | 80  | 71.25  | 83.5 ± 5.9   | 155      | 76.77  | 78.3 ± 7.0    |
| 18. Shafagoj et al. [72]             | 2018 | Jordan    | 38  | 63.16  | 74.2 ± 5.4   | 33       | 66.67  | 72.4 ± 6.3    |
| 19. Solfrizzi et al. [73] *          | 2002 | Italy     | 49  | 75.51  | 71.6 ± 9.3   | 45       | 71.11  | 65.8 ± 11.6   |
| 20. Tang et al. [74]                 | 2019 | China     | 143 | 45.45  | 62.89 ± 8.38 | 140      | 46.43  | 64.10 ± 9.49  |
| 21. Warren, Hynan, Weiner [75]       | 2012 | America   | 150 | 70.00  | 79.5 ± 6.17  | 197      | 69.04  | 70 ± 6.33     |
| 22. Watanabe et al. [76] *           | 2005 | Japan     | 106 | -      | 79 ± 7       | 227      | -      | 76 ± 10       |
| 23. Werh et al. [77]                 | 2006 | Sweden    | 97  | 90.72  | 77.9 ± 3.0   | 139      | 94.24  | 78.5 ± 3.0    |
| 24. Wolf et al. [78]                 | 2004 | Japan     | 25  | 4.00   | 80 ± 6       | 26       | 34.62  | 77 ± 5        |
| 25. Yamamoto et al. [79]             | 2005 | Turkey    | 61  | 19.67  | 74.1 ± 7.4   | 32       | 38.46  | 74.5 ± 6.3    |
| 26. Yavuz et al. [80]                | 2008 | Poland    | 132 | 75.00  | 71.8 ± 7.9   | 158      | 58.86  | 70.5 ± 8.8    |
| <b>Liu et al. [1]</b>                |      |           |     |        |              |          |        |               |
| Lehtonen, Luutonen [64]*             | 1986 | Finland   | 22  | -      | >90          | 23       | -      | >90           |
| Kuo et al. [63]                      | 1998 | USA       | 64  | -      | 81.6         | 36       | -      | 78.7          |
| 27. Kalman et al. [81]               | 1999 | USA       | 24  | 75.00  | 70.2         | 15       | 73.00  | 64.8          |
| 28. Merched et al. [82]              | 2000 | France    | 98  | 71.4   | 77.56        | 59       | 52.5   | 75.37         |
| Solfrizzi et al. [73]                | 2002 | Italy     | 18  | 0.00   | 74.2         | 30       | 0.00   | 68.4          |
| Solfrizzi et al. [73]                | 2002 | Italy     | 43  | 100.00 | 70.2         | 33       | 100.00 | 67            |
| 29. Lesser et al. [83] <sup>1</sup>  | 2009 | USA       | 144 | -      | -            | 151      | -      | -             |
| 30. Sun et al. [84]                  | 2010 | China     | 45  | 64.00  | 59-92        | 44       | 68.00  | 58-87         |

**Table 1.** Characteristics of studies included in the meta-analysis

| Study (N = 100)                    | Year | Country  | Cases |        |         | Controls |        |         |
|------------------------------------|------|----------|-------|--------|---------|----------|--------|---------|
|                                    |      |          | n     | % F    | Age     | n        | % F    | Age     |
| 31. Preseki et al. [85]            | 2011 | Croatia  | 50    | -      | 79.1    | 58       | -      | 71.6    |
| 32. Parnowski, Kaluza # [86]       | 2013 | Poland   | 39    | 66.6   | 80.12   | 44       | 75.00  | 72.95   |
| 33. R V ~                          | 2016 | India    | 167   | 0.00   | 69.8    | 984      | 0.00   | 63.1    |
| R V ~                              | 2016 | India    | 137   | 100.00 | 67.8    | 882      | 100.00 | 62.4    |
| 34. Grossi et al. [87]             | 2018 | Brazi    | 40    | 30.00  | 78(7)   | 40       | 31.00  | 76.5    |
| <b>Wu et al. [12]</b>              |      |          |       |        |         |          |        |         |
| 35. Agarwal et al. [88]            | 2015 | Indian   | 39    | 69     | 67±9    | 42       | 52     | 62±8    |
| 36. Alam et al. [89]               | 2014 | Indian   | 75    | 68     | 66±9    | 120      | 63     | 63±8    |
| Ban et al. [57]                    | 2009 | Japanese | 197   | 40     | 80±1    | 47       | 62     | 75±1    |
| 37. Cankurtaran et al. [90]        | 2005 | Turks    | 120   | 34     | 74±8    | 803      | 37     | 71±6    |
| 38. Chang et al. [91]              | 2014 | Chinese  | 44    | /      | 80±9    | 62       | NA     | 80±8    |
| 39. Duan, Ling, Zhou [92]          | 2006 | Chinese  | 62    | 47     | 65±3    | 50       | 60     | 56±3    |
| 40. Han [93]                       | 2005 | Chinese  | 27    | 33     | 72±11   | 27       | NA     | NA      |
| Hoshino, Kamino,<br>Matsumoto [61] | 2002 | Japanese | 82    | 28     | 84±3    | 40       | 33     | /77±7   |
| 41. Li [94]                        | 2014 | Chinese  | 45    | 36     | 64±2    | 45       | 36     | 64±3    |
| 42. Liu, Chen [95]                 | 2006 | Chinese  | 31    | 45     | 69±7    | 40       | 43     | 69±8    |
| 43. Liu [96]                       | 2005 | Chinese  | 268   | 47     | 74±3    | 325      | 46     | 74±2    |
| 44. Raygani et al. [97]            | 2006 | Iranians | 94    | 44     | 74±10   | 111      | 37     | 72±11   |
| 45. Shim [98]                      | 2010 | Korean   | 78    | 40     | 72±9    | 58       | 36     | 63±7    |
| 46. Singh et al. [99]              | 2012 | Indian   | 70    | 76     | NA      | 75       | NA     | NA      |
| 47. Sun [100]                      | 2006 | Chinese  | 82    | 55     | 81±3    | 46       | 83     | 78±4    |
| 48. Vasantharekha et al.<br>[101]  | 2016 | Indian   | 304   | 47     | 69±5    | 1868     | 53     | 63±2    |
| 49. Wada [102]                     | 2000 | Japanese | 36    | 29     | 77±5    | 15       | 13     | 72±6    |
| 50. Wang et al. [103]              | 2005 | Chinese  | 35    | 35     | 69±8    | 16       | 44     | 70±7    |
| 51. Wang [104]                     | 2006 | Chinese  | 124   | 47     | NA      | 80       | 50     | NA      |
| 52. Wang [105]                     | 2017 | Chinese  | 43    | 44     | 67±10   | 45       | 36     | 64±6    |
| 53. Wang, Zhang [106]              | 2016 | Chinese  | 39    | 41     | 68±7    | 40       | 45     | 71±7    |
| Wang, Zhang [106]                  | 2016 | Chinese  | 34    | /      | 74±8    | 40       | 45     | 71±7    |
| 54. Watanabe et al. [107]          | 2004 | Japanese | 34    | 76     | 76±9    | 63       | NA     | 72±11   |
| Watanabe et al. [76]               | 2005 | Japanese | 106   | 55     | 79±7    | 227      | 70     | 76±10   |
| 55. Xiao et al. [108]              | 2012 | Chinese  | 104   | 36     | 78±7    | 104      | 54     | 77±6    |
| 56. Xiao hong et al. [109]         | 2010 | Chinese  | 45    | 39     | 59 ~ 92 | 44       | 32     | 58 ~ 87 |
| Yamamoto et al. [79]               | 2005 | Japanese | 61    | 33     | 80±6    | 32       | 53     | 77±5    |
| 57. Yang, Tian, Zhong [110]        | 2007 | Chinese  | 15    | 45     | 73±8    | 29       | 56     | 60±7    |
| 58. Yu et al. [111]                | 2014 | Chinese  | 201   | 33     | 77±6    | 257      | 47     | 76±7    |
| 59. Yuan et al. [112]              | 2006 | Chinese  | 30    | 38     | 71±7    | 60       | 30     | 65±6    |
| 60. Yue et al. [113]               | 2009 | Chinese  | 111   | 48     | 69±9    | 117      | 38     | 66±9    |
| 61. Zengi et al. [114]             | 2012 | Turks    | 21    | 50     | 76±8    | 20       | 55     | 81±7    |
| 62. Zhao et al. [115]              | 2014 | Chinese  | 48    | 33     | 69±6    | 37       | 51     | 71±6    |
| 63. Zheng et al. [116]             | 2016 | Chinese  | 207   | 50     | 81±8    | 256      | 35     | 82±6    |
| 64. Zhong et al. [117]             | 2016 | Chinese  | 54    | 55     | 70±8    | 54       | 54     | 71±7    |
| 65. Zhou [118]                     | 2015 | Chinese  | 40    | 45     | 68±2    | 40       | 58     | 68±3    |

**Table 1.** Characteristics of studies included in the meta-analysis

| Study (N = 100)                    | Year      | Country | Cases |       |              | Controls    |       |              |
|------------------------------------|-----------|---------|-------|-------|--------------|-------------|-------|--------------|
|                                    |           |         | n     | % F   | Age          | n           | % F   | Age          |
| 66. Zhu [119]                      | 2007      | Chinese | 31    | 43    | 69±7         | 40          | 43    | 69±7         |
| <b>Wang et al. [18]</b>            |           |         |       |       |              |             |       |              |
| 67. Papassotiropoulos et al. [120] | 2002      |         | 32    | 62.00 | 69 ± 8       | 7           | 29.00 | 55 ± 10      |
| 68. Martínez-Morillo et al. [121]  | 2014      |         | 38    | 64.00 | (60-94)      | 37          | 53.00 | (43-80)      |
| 69. Kölsch et al. [122]            | 2006      |         | 75    | 63.40 | 68.4 ± 7.9   | 39          | 53.80 | 65.9 ± 11.4  |
| 70. Kölsch et al. a [123]          | 2009      |         | 118   | 61.90 | 68.5 ± 7.9   | 62          | 57.90 | 70.4 ± 7.1   |
| 71. Kölsch et al. b [124]          | 2009      |         | 149   | 69.10 | 74.1 ± 7.9   | 86          | 53.50 | 72.8 ± 7.6   |
| 72. Kölsch et al. [125]            | 2010      |         | 90    | 63.90 | 70.6 ± 8.3   | 57          | 51.60 | 69.3 ± 6.8   |
| 73. Qureischie et al. [126]        | 2008      |         | 104   | 68.00 | 72.5 ± 8.8   | 49          | 72.40 | 72.4 ± 7.9   |
| 74. Mateos et al. [127]            | 2011      |         | 21    | 66.70 | 67.3 ± 1.70  | 28          | 67.90 | 57.8 ± 1.27  |
| 75. Wollmer et al. [128]           | 2003      |         | 24    | 58.00 | 73.5 ± 5.5   | 22          | 49.40 | 70.1 ± 6.3   |
| 76. Wollmer et al. [129]           | 2003      |         | 24    | -     | 71.7 ± 7.8   | 22          | -     | 65.6         |
| 77. Shafaati et al. [130]          | 2007      |         | 17    | 41.20 | (62–83)      | 43          | 65.10 | (18–85)      |
| 78. Schönknecht et al. [131]       | 2002      |         | 17    | 42.90 | 75.4 ± 10.3  | 55          | 40.00 | 69.0 ± 5.8   |
| 79. Popp et al. [132]              | 2012      |         | 53    | 62.30 | 71.23 ± 8.29 | 43          | 51.20 | 67.33 ± 9.04 |
| 80. Popp et al. [133]              | 2013      |         | 106   | 64.20 | 71.1 ± 7.87  | 87          | 49.40 | 67.7 ± 9.13  |
| 81. Vanmierlo et al. [134]         | 2011      |         | 67    | 44.80 | 71.8 ± 7.5   | 29          | 62.70 | 69.0 ± 6.9   |
| 82. Leoni, Caccia [135]            | 2013      |         | 24    | 70.80 | 66.8 ± 8.0   | 28          | 65.80 | 68.6 ± 2.85  |
| <b>Xu et al. [13]</b>              |           |         |       |       |              |             |       |              |
| 83. Tan et al. [35]                | 2003      | USA     | 77    | -     | -            | 1026        | 62.96 | 76.1         |
| 84. Li et al. [136]                | 2005      | USA     | 152   | -     | -            | 2123        | 59.20 | 74.9         |
| 85. Solomon et al. [137]           | 2009      | USA     | 469   | 59.91 | 69.90        | 9844        | 0     | -            |
| 86. Mielke et al. [138]            | 2010      | Sweden  | 46    | -     | -            | 648         | 0     | -            |
| 87. Huang et al. [139]             | 20s1<br>4 | Taiwan  | 612   | -     | -            | 14274<br>4  | 48.20 | -            |
| 88. Kivipelto et al. [140]         | 2005      | Karelia | 48    | -     | -            | 1449        | 63.14 | -            |
| 89. Reitz et al. [48]              | 2010      | USA     | 101   | 65.34 | 79.70        | 1130        | 65.66 | 75.7         |
| 90. Kimm et al. [141]              | 2011      | Korea   | 821   | -     | -            | 49044<br>5  | 0     | 51.9         |
| Kimm et al. [141]                  | 2011      | Korea   | 1030  | 100   | -            | 35806<br>0  | 100   | 53.6         |
| 91. Kivipelto et al. [142]         | 2002      | Finland | 48    | -     | -            | 1449        | 66.04 | -            |
| 92. Hayden et al. [143]            | 2006      | UK      | 104   | 73.07 | 81.50        | 3264        | 58.24 | 74           |
| 93. Notkola et al. [144]           | 1998      | Finland | 27    | -     | -            | 444         | 0     | -            |
| 94. Rönnemaa et al. [145]          | 2012      | Sweden  | 127   | -     | -            | 2268        | -     | 49.6         |
| 95. Wang et al. [146]              | 2012      | Taiwan  | 8488  | -     | -            | 12304<br>00 | 51.95 | -            |

**Table 1.** Characteristics of studies included in the meta-analysis

| Study (N = 100)            | Year | Country | Cases |     |       | Controls |       |      |
|----------------------------|------|---------|-------|-----|-------|----------|-------|------|
|                            |      |         | n     | % F | Age   | n        | % F   | Age  |
| 96. Lieb et al. [147]      | 2012 | USA     | 18    | 100 | 73.97 | 99       | 100   | -    |
| 97. Dal Forno et al. [148] | 2005 | USA     | 40    | -   | -     | 576      | 0     | 66.8 |
| Dal Forno et al. [148]     | 2005 | USA     | 67    | 100 | -     | 781      | 100   | 64   |
| Singh et al. [99]          | 2012 | India   | 0     | -   | -     | 0        | -     | -    |
| 98. Forti et al. [149]     | 2010 | Italy   | 18    | -   | -     | 466      | 51.28 | 69.3 |
| Forti et al. [149]         | 2010 | Italy   | 30    | -   | -     | 238      | 67.64 | 79.8 |
| 99. Raffaitin et al. [150] | 2009 | France  | 134   | -   | -     | 7087     | 60.99 | -    |
| 100. Muller et al. [151]   | 2007 | USA     | 147   | -   | -     | 1833     | 67.32 | 76.1 |
| Singh et al. [99]          | 2012 | India   | 0     | -   | -     | 145      | -     | -    |

\*K=6 articles were duplicated in LDL-C. The number of participants were deleted for main analysis.

<sup>1</sup> Total N Cases = 144; n/LDL-C=41; n/HDL-C=41; n/TC=62; Total N Control = 151; n/LDL-C=48; n/HDL-C=48; n/TC=55

**Table 2.** Factors included in primary meta-analysis that showed positive and negative association with AD.

| Study                           | LDL_C                 |        | HDL_C |   | TC |   | TG |   |
|---------------------------------|-----------------------|--------|-------|---|----|---|----|---|
|                                 | SMD (95% CI)          | Weight |       |   |    |   |    |   |
| <b>Zhou et al. [33]</b>         |                       |        |       |   |    |   |    |   |
| Ban et al. [57]                 | 0.80 (0.47 ~ 1.12)    | 4.1    | -     | - | -  | - | -  | - |
| Cacabelos et al. [58]           | 0.01 (-0.24 ~ 0.26)   | 4.2    | -     | - | -  | - | -  | - |
| Caramelli et al. [59]           | 0.14 (-0.39 ~ 0.67)   | 3.6    | -     | - | -  | - | -  | - |
| Chen et al. [60]                | 1.19 (0.91 ~ 1.47)    | 4.2    | -     | - | -  | - | -  | - |
| Hoshino, Kamino, Matsumoto [61] | 0.34 (-0.04 ~ 0.72)   | 3.9    | -     | - | -  | - | -  | - |
| Kouzuki et al. [62]             | -0.22 (-0.77 ~ 0.34)  | 3.5    | -     | - | -  | - | -  | - |
| Kuo et al. [63]                 | 4.45 (3.70 ~ 5.20)    | 3.0    | -     | - | -  | - | -  | - |
| Lehtonen, Luutonen [64]         | 0.57 (-0.03 ~ 1.17)   | 3.4    | -     | - | -  | - | -  | - |
| Lesser et al. [65]              | 0.32 (-0.19 ~ 0.84)   | 3.6    | -     | - | -  | - | -  | - |
| Macesic et al. [66]             | 1.07 (0.65 ~ 1.50)    | 3.8    | -     | - | -  | - | -  | - |
| Mamo et al. [67]                | -0.16 (-1.04 ~ 0.72)  | 2.7    | -     | - | -  | - | -  | - |
| Moroney et al. [45]             | -0.25 (-0.40 ~ -0.10) | 4.3    | -     | - | -  | - | -  | - |
| Panza et al. [68]               | -0.63 (-1.04 ~ -0.21) | 3.9    | -     | - | -  | - | -  | - |
| Paragh et al. [69]              | 2.04 (1.46 ~ 2.63)    | 3.4    | -     | - | -  | - | -  | - |
| Reitz et al. [37]               | -0.00 (-0.13 ~ 0.13)  | 4.4    | -     | - | -  | - | -  | - |
| Ryglewicz et al. [70]           | 0.29 (-0.20 ~ 0.77)   | 3.7    | -     | - | -  | - | -  | - |
| Scacchi et al. [71]             | -0.45 (-0.73 ~ -0.18) | 4.2    | -     | - | -  | - | -  | - |
| Shafagoj et al. [72]            | -0.32 (-0.79 ~ 0.15)  | 3.7    | -     | - | -  | - | -  | - |
| Solfrizzi et al. [73]           | -0.69 (-1.11 ~ -0.28) | 3.9    | -     | - | -  | - | -  | - |
| Tang et al. [74]                | 0.39 (0.15 ~ 0.62)    | 4.2    | -     | - | -  | - | -  | - |
| Warren, Hynan, Weiner [75]      | 0.50 (0.28 ~ 0.72)    | 4.3    | -     | - | -  | - | -  | - |
| Watanabe et al. [76]            | 0.17 (-0.06 ~ 0.40)   | 4.2    | -     | - | -  | - | -  | - |

**Table 2.** Factors included in primary meta-analysis that showed positive and negative association with AD.

| <b>Study</b>             | <b>LDL_C</b>          |               | <b>HDL_C</b>          |               | <b>TC</b>             |               | <b>TG</b>             |               |
|--------------------------|-----------------------|---------------|-----------------------|---------------|-----------------------|---------------|-----------------------|---------------|
| Werh et al. [77]         | 0.36 (0.10 ~ 0.62)    | 4.2           | -                     | -             | -                     | -             | -                     | -             |
| Wolf et al. [78]         | 0.20 (-0.35 ~ 0.75)   | 3.50          | -                     | -             | -                     | -             | -                     | -             |
| Yamamoto et al. [79]     | 0.08 (-0.35 ~ 0.51)   | 3.80          | -                     | -             | -                     | -             | -                     | -             |
| Yavuz et al. [80]        | -0.02 (-0.25 ~ -0.21) | 4.20          | -                     | -             | -                     | -             | -                     | -             |
| <b>Liu et al. [1]</b>    | <b>OR (95% CI)</b>    | <b>Weight</b> | <b>SMD (95% CI)</b>   | <b>Weight</b> | <b>SMD (95% CI)</b>   | <b>Weight</b> | <b>SMD (95% CI)</b>   | <b>Weight</b> |
| Lehtomen, Luutonen [64]  | 0.58 (-0.02 ~ 1.18)   | 10.86         | -0.02 (-0.61-0.56)    | 8.77          | 0.43 (-0.16 ~ 1.02)   | 7.53          | 0.19 (-0.40 ~ 0.77)   | 6.32          |
| Kuo et al. [63]          | 4.49 (3.74 ~ 5.24)    | 10.36         | -2.76 (-3.33 ~ -2.20) | 8.82          | 0.00 (-0.65 ~ 0.65)   | 7.54          | -                     | -             |
| Kalman et al. [81]       | -0.19 (-0.83 ~ 0.46)  | 10.71         | 0.75 (0.08 ~ 1.42)    | 8.54          | -0.40 (-0.72 ~ -0.07) | 7.44          | -0.31 (-0.96 ~ 0.34)  | 5.77          |
| Merched et al. [82]      | -                     | -             | -1 (-1.34 ~ -0.66)    | 1.29          | -1.15 (-1.78 ~ -0.52) | 7.89          | -0.26 (-0.5 ~ 0.07)   | 8.95          |
| Solfrizzi et al. [73]    | -                     | -             | -                     | -             | -0.17 (-0.62 ~ 0.28)  | 7.46          | -                     | -             |
| Solfrizzi et al. [73]    | -                     | -             | -                     | -             | 4.83 (4.11 ~ 5.55)    | 7.73          | -                     | -             |
| Lesser et al. [83]       | 3.26 (2.62 ~ 3.90)    | 10.73         | 1.38 (0.92 ~ 1.85)    | 9.05          | 0.57 (0.15 ~ 1)       | 7.29          | -                     | -             |
| Sun et al. [84]          | -                     | -             | -0.29 (-0.71 ~ 0.13)  | 9.15          | 0.45 (0.07 ~ 0.84)    | 7.77          | -                     | -             |
| Preseki et al. [85]      | 0.43 (0.05 ~ 0.81)    | 11.39         | 0.48 (0.10 ~ 0.87)    | 9.21          | -0.31 (-0.74 ~ 0.13)  | 7.82          | 0.54 (0.15 ~ 0.92)    | 8.32          |
| Parnowski, Kaluza # [86] | 0.45 (0.01 ~ 0.89)    | 11.27         | -1.04 (-1.50 ~ -0.58) | 9.06          | 1.23 (1.05 ~ 1.40)    | 7.76          | 0.06 (-0.50 ~ 0.62)   | 6.57          |
| R V                      | 1.30 (1.12 ~ 1.47)    | 11.71         | -1.50 (-1.67 ~ -1.32) | 9.51          | 1.87 (1.67 ~ 2.07)    | 8.01          | -                     | -             |
| R V                      | 2.26 (2.05 ~ 2.46)    | 11.68         | -1.51 (-1.70 ~ -1.32) | 9.49          | -0.28 (-0.72 ~ 0.16)  | 7.99          | -                     | -             |
| Grossi et al. [87]       | 0.25 (-0.19-0.69)     | 11.27         | -0.16 (-0.60 ~ 0.28)  | 9.11          | 0.76 (0.13 ~ 1.40)    | 7.75          | -0.75(-1.20 ~ -0.30)  | 7.61          |
| <b>Wu et al. [12]</b>    | <b>SMD (95% CI)</b>   |               |                       |               | <b>SMD (95% CI)</b>   |               |                       | -             |
| Agarwal et al. [88]      | 0.13 (-0.31 ~ 0.56)   | -             | 0.13 (-0.31 ~ 0.56)   | -             | 0.28 (-0.16 ~ 0.72)   | -             | -                     | -             |
| Alam et al. [89]         | 0.15 (-0.14 ~ 0.44)   | -             | -0.22 (-0.51 ~ 0.07)  | -             | 0.12 (-0.17 ~ 0.41)   | -             | 0.18 (-0.11 ~ 0.46)   | -             |
| Ban et al. [57]          | 0.80 (0.47 ~ 1.12)    | -             | 1.26 (0.92 ~ 1.60)    | -             | -                     | -             | -1.25 (-1.58 ~ -0.91) | -             |
| Cankurtaran et al. [90]  | -0.02 (-0.21 ~ 0.17)  | -             | 0.08 (-0.11 ~ 0.27)   | -             | 0.04 (-0.15 ~ 0.23)   | -             | 0.03 (-0.16 ~ 0.22)   | -             |
| Chang et al. [91]        | -                     | -             | 0.11 (-0.27 ~ 0.50)   | -             | 0.15 (-0.23 ~ 0.54)   | -             | -0.08 (-0.46 ~ 0.31)  | -             |

**Table 2.** Factors included in primary meta-analysis that showed positive and negative association with AD.

| Study                           | LDL_C                 |   | HDL_C                 |   | TC                   | TG |                       |   |
|---------------------------------|-----------------------|---|-----------------------|---|----------------------|----|-----------------------|---|
| Duan, Ling, Zhou [92]           | -                     | - | -                     | - | 0.82 (0.43 ~ 1.21)   | -  | 0.78 (0.40 ~ 1.17)    | - |
| Han [93]                        | 0.00 (-0.53 ~ 0.53)   | - | 0.00 (-0.53 ~ 0.53)   | - | 0.00 (-0.53 ~ 0.53)  | -  | 0.00 (-0.53 ~ 0.53)   | - |
| Hoshino, Kamino, Matsumoto [61] | 0.34 (-0.04 ~ 0.72)   | - | -0.08 (-0.46 ~ 0.30)  | - | -                    | -  | -                     | - |
| Li [94]                         | -0.01 (-0.42 ~ 0.40)  | - | -0.07 (-0.48 ~ 0.34)  | - | 0.00 (-0.41 ~ 0.41)  | -  | -                     | - |
| Liu, Chen [95]                  | 0.85 (0.36 ~ 0.69)    | - | 0.05 (-0.42 ~ 0.52)   | - | 0.79 (0.30 ~ 1.28)   | -  | 0.91 (0.42 ~ 1.40)    | - |
| Liu [96]                        | 0.52 (0.36 ~ 1.34)    | - | -0.09 (-0.25 ~ 0.08)  | - | 0.33 (0.16 ~ 0.49)   | -  | 0.06 (-0.10 ~ 0.23)   | - |
| Raygani et al. [97]             | 0.52 (0.24 ~ 0.80)    | - | -0.74 (-1.02 ~ -0.45) | - | 0.38 (0.10 ~ 0.65)   | -  | 0.17 (-0.11 ~ 0.45)   | - |
| Shim [98]                       | -0.29 (-0.64 ~ 0.05)  | - | 0.16 (-0.18 ~ 0.50)   | - | -0.28 (-0.62 ~ 0.06) | -  | -                     | - |
| Singh et al. [99]               | 0.95 (0.61 ~ 1.30)    | - | -0.54 (-0.87 ~ -0.21) | - | 1.38 (1.02 ~ 1.74)   | -  | 0.00 (-0.33 ~ 0.32)   | - |
| Sun [100]                       | -0.29 (-0.65 ~ 0.07)  | - | 0.03 (-0.33 ~ 0.39)   | - | -0.11 (-0.47 ~ 0.26) | -  | 0.14 (-0.22 ~ 0.50)   | - |
| Vasantharekha et al. [101]      | 1.72 (1.59 ~ 1.85)    | - | -1.48 (-1.61 ~ -1.36) | - | 1.50 (1.37 ~ 1.63)   | -  | 0.17 (0.05 ~ 0.29)    | - |
| Wada [102]                      | -0.14 (-0.74 ~ 0.47)  | - | 0.25 (-0.36 ~ 0.85)   | - | -0.37 (-0.98 ~ 0.24) | -  | -0.58 (-1.19 ~ 0.04)  | - |
| Wang et al. [103]               | 0.54 (-0.06 ~ 1.14)   | - | 0.14 (-0.45 ~ 0.73)   | - | 0.61 (0.01 ~ 1.22)   | -  | 0.82 (0.21 ~ 1.43)    | - |
| Wang [104]                      | 1.62 (1.29 ~ 1.94)    | - | -0.23 (-0.51 ~ 0.06)  | - | -0.20 (-0.49 ~ 0.08) | -  | 1.36 (1.05 ~ 1.67)    | - |
| Wang et al. [105]               | -                     | - | -0.94 (-1.38 ~ -0.50) | - | -                    | -  | -                     | - |
| Wang, Zhang [106]               | 0.00 (-0.44 ~ 0.44)   | - | 0.00 (-0.44 ~ 0.44)   | - | 0.00 (-0.44 ~ 0.44)  | -  | -                     | - |
| Wang, Zhang [106]               | 0.25 (-0.21 ~ 0.71)   | - | 0.00 (-0.46 ~ 0.46)   | - | 0.15 (-0.31 ~ 0.61)  | -  | -                     | - |
| Watanabe et al. [107]           | 0.03 (-0.39 ~ 0.45)   | - | 0.00 (-0.42 ~ 0.42)   | - | -0.27 (-0.69 ~ 0.15) | -  | -0.34 (-0.76 ~ 0.09)  | - |
| Watanabe et al. [76]            | 0.17 (-0.06 ~ 0.40)   | - | 0.32 (0.09 ~ 0.55)    | - | -0.08 (-0.31 ~ 0.16) | -  | -0.27 (-0.50 ~ -0.04) | - |
| Xiao et al. [108]               | 0.08 (-0.19 ~ 0.35)   | - | -0.36 (-0.63 ~ 0.08)  | - | 0.39 (0.12 ~ 0.67)   | -  | 0.06 (-0.21 ~ 0.33)   | - |
| Xiao hong et al., [109]         | -                     | - | -0.73 (-1.16 ~ -0.30) | - | 0.57 (0.15 ~ 1.00)   | -  | -                     | - |
| Yamamoto et al. [79]            | 0.08 (-0.35 ~ 0.51)   | - | 0.06 (-0.37 ~ 0.49)   | - | -0.07 (-0.50 ~ 0.35) | -  | -0.22 (-0.65 ~ 0.21)  | - |
| Yang, Tian, Zhong [110]         | -0.40 (-1.03 ~ 0.23)  | - | 0.55 (-0.09 ~ 1.18)   | - | -0.08 (-0.71 ~ 0.54) | -  | -0.19 (-0.81 ~ 0.44)  | - |
| Yu et al. [111]                 | 0.13 (-0.06 ~ 0.31)   | - | -0.02 (-0.20 ~ 0.17)  | - | 0.30 (0.12 ~ 0.49)   | -  | -0.10 (-0.29 ~ 0.08)  | - |
| Yuan et al. [112]               | -1.06 (-1.53 ~ -0.60) | - | -0.06 (-0.50 ~ 0.38)  | - | 0.81 (0.35 ~ 1.26)   | -  | 0.66 (0.22 ~ 1.11)    | - |

**Table 2.** Factors included in primary meta-analysis that showed positive and negative association with AD.

| Study                          | LDL_C                |   | HDL_C                 |               | TC                    |               | TG                    |   |
|--------------------------------|----------------------|---|-----------------------|---------------|-----------------------|---------------|-----------------------|---|
| Yue et al. [113]               | 0.14 (-0.12 ~ 0.40)  | - | -0.11 (-0.37 ~ 0.15)  | -             | 0.31 (0.05 ~ 0.57)    | -             | 0.46 (0.19 ~ 0.72)    | - |
| Zengi et al. [114]             | -0.57 (-1.19 ~ 0.06) | - | -0.26 (-0.88 ~ 0.35)  | -             | -0.87 (-1.51 ~ -0.23) | -             | -1.48 (-2.17 ~ -0.79) | - |
| Zhao et al. [115]              | 0.05 (-0.38 ~ 0.48)  | - | -0.96 (-1.42 ~ -0.51) | -             | -0.26 (-0.69 ~ 0.18)  | -             | 0.85 (0.40 ~ 1.30)    | - |
| Zheng et al. [116]             | 0.08 (-0.10 ~ 0.27)  | - | -0.21 (-0.39 ~ -0.03) | -             | 0.16 (-0.02 ~ 0.35)   | -             | 0.33 (0.15 ~ 0.52)    | - |
| Zhong et al. [117]             | 0.58 (0.19 ~ 1.30)   | - |                       | -             |                       | -             | 0.79 (0.40 ~ 1.18)    | - |
| Zhou [118]                     | 0.84 (0.39 ~ 1.30)   | - | 0.10 (-0.34 ~ 0.54)   | -             | 0.78 (0.32 ~ 1.23)    | -             | -                     | - |
| Zhu [119]                      | 0.85 (0.36 ~ 1.34)   | - | 0.05 (-0.42 ~ 0.52)   | -             | 0.79 (0.30 ~ 1.28)    | -             | 0.91 (0.42 ~ 1.40)    | - |
| <b>Wang et al. [18]</b>        |                      |   |                       |               | <b>SMD (95% CI)</b>   |               |                       | - |
| Papassotiropoulos et al. [120] | -                    | - | -                     | -             | 0.68 (-0.15 ~ 1.52)   | -             | -                     | - |
| Martínez-Morillo et al. [121]  | -                    | - | -                     | -             | 0.06 (-0.40 ~ 0.51)   | -             | -                     | - |
| Kölsch et al. [122]            | -                    | - | -                     | -             | -2.78 (-3.31 ~ -2.25) | -             | -                     | - |
| Kölsch et al. a [123]          | -                    | - | -                     | -             | -0.91 (-1.23 ~ -0.58) | -             | -                     | - |
| Kölsch et al. b [124]          | -                    | - | -                     | -             | -0.62 (-0.89 ~ -0.35) | -             | -                     | - |
| Kölsch et al. [125]            | -                    | - | -                     | -             | -0.45 (-0.78 ~ -0.11) | -             | -                     | - |
| Qureischie et al. [126]        | -                    | - | -                     | -             | -1.28 (-1.65 ~ -0.91) | -             | -                     | - |
| Mateos et al. [127]            | -                    | - | -                     | -             | 0.40 (-0.17 ~ 0.97)   | -             | -                     | - |
| Wollmer et al. [128]           | -                    | - | -                     | -             | -0.72 (-1.31 ~ -0.12) | -             | -                     | - |
| Wollmer et al. [129]           | -                    | - | -                     | -             | -0.67 (-1.26 ~ -0.07) | -             | -                     | - |
| Shafaati et al. [130]          | -                    | - | -                     | -             | 2.68 (1.93 ~ 3.43)    | -             | -                     | - |
| Schönknecht et al. [131]       | -                    | - | -                     | -             | 0.44 (-0.11 ~ 0.99)   | -             | -                     | - |
| Popp et al. [132]              | -                    | - | -                     | -             | -0.37 (-0.77 ~ 0.04)  | -             | -                     | - |
| Popp et al. [133]              | -                    | - | -                     | -             | -0.42 (-0.71 ~ -0.13) | -             | -                     | - |
| Vanmierlo et al. [134]         | -                    | - | -                     | -             | -0.30 (-0.74 ~ 0.14)  | -             | -                     | - |
| Leoni, Caccia [135]            | -                    | - | -                     | -             | 1.10 (0.52 ~ 1.69)    | -             | -                     | - |
| <b>Xu et al. [13]</b>          |                      |   | <b>RR (95% CI)</b>    | <b>Weight</b> | <b>RR (95% CI)</b>    | <b>Weight</b> |                       | - |



**Table 2.** Factors included in primary meta-analysis that showed positive and negative association with AD.

| Study                     | LDL_C     |   | HDL_C              |       | TC                 | TG    |           |   |
|---------------------------|-----------|---|--------------------|-------|--------------------|-------|-----------|---|
| Tan et al. [35]           | -         | - | -                  | -     | 0.97 (0.90 ~ 1.05) | 16.01 | -         | - |
| Li et al. [136]           | -         | - | 1.23 (0.71 ~ 2.15) | 3.68  | 1.00 (0.61 ~ 1.62) | 5.4   | -         | - |
| Solomon et al. [137]      | -         | - | -                  | -     | 1.58 (1.22 ~ 2.06) | 6.83  | -         | - |
| Mielke et al. [138]       | -         | - | -                  | -     | 2.82 (0.94 ~ 8.43) | 0.14  | -         | - |
| Huang et al. [139]        | -         | - | -                  | -     | 1.06 (0.75 ~ 1.51) | 7.65  | -         | - |
| Kivipelto et al. [140]    | -         | - | -                  | -     | 2.12 (1.05 ~ 4.30) | 0.74  | -         | - |
| Reitz et al. [48]         | -         | - | -                  | -     | 0.80 (0.40 ~ 1.50) | 4.79  | -         | - |
| Kimm et al. [141]         | -         | - | -                  | -     | 1.20 (1.00 ~ 1.50) | 11.06 | -         | - |
| Kimm et al. [141]         | -         | - | -                  | -     | 1.10 (0.90 ~ 1.30) | 12.6  | -         | - |
| Kivipelto et al. [142]    | -         | - | -                  | -     | 2.80 (1.20 ~ 6.70) | 0.26  | -         | - |
| Hayden et al. [143]       | -         | - | -                  | -     | 0.47 (0.19 ~ 0.98) | 7.33  | -         | - |
| Notkola et al. [144]      | -         | - | -                  | -     | 3.10 (1.20 ~ 8.50) | 0.15  | -         | - |
| Ronnemaa et al. [145]     | -         | - | -                  | -     | 1.00 (0.90 ~ 1.20) | 14.13 | -         | - |
| Wang et al. [146]         | -         | - | -                  | -     | 0.69 (0.66 ~ 1.32) | 10.80 | -         | - |
| Lieb et al. [147]         | -         | - | 1.60 (0.50 ~ 5.50) | 0.3   | 0.80 (0.20 ~ 2.50) | 1.41  | -         | - |
| Dal Forno et al. [148]    | -         | - | -                  | -     | 0.59 (0.23 ~ 1.53) | 3.74  | -         | - |
| Dal Forno et al. [148]    | -         | - | -                  | -     | 0.35 (0.14 ~ 0.89) | 7.76  | -         | - |
| Singh et al. [99]         | -         | - | -                  | -     | 1.15 (1.01 ~ 1.32) | 15.70 | -         | - |
| Forti et al. [149]        | -         | - | 0.56 (0.12 ~ 2.71) | 1.14  | -                  | -     | -         | - |
| Forti et al. [149]        | -         | - | 0.83 (0.27 ~ 2.49) | 1.55  | -                  | -     | -         | - |
| Raffaitin et al. [150]    | -         | - | 0.80 (0.27 ~ 2.49) | 6.91  | -                  | -     | -         | - |
| Muller et al. [151]       | -         | - | 1.00 (0.70 ~ 1.40) | 15.56 | -                  | -     | -         | - |
| Singh et al. [99]         | -         | - | 1.02 (0.86 ~ 1.19) | 1     | 1.15 (1.01 ~ 1.32) | 9.79  | -         | - |
| <b>Total effect sizes</b> | <b>68</b> |   | <b>53</b>          |       | <b>81</b>          |       | <b>34</b> |   |

## References

1. Ban, Y.; Watanabe, T.; Suguro, T.; Matsuyama, T.; Iso, Y.; Sakai, T.; Sato, R.; Idei, T.; Nakano, Y.; Ota, H. Increased plasma urotensin-II and carotid atherosclerosis are associated with vascular dementia. *J. Atheroscler. Thromb.* **2009**, *16*, 179–187. <https://doi.org/10.5551/jat.E608>
2. Cacabelos, R.; Fernandez-Novoa, L.; Lombardi, V.; Corzo, L.; Pichel, V.; Kubota, Y. Cerebrovascular risk factors in Alzheimer's disease: brain hemodynamics and pharmacogenomic implications. *Neurol. Res.* **2003**, *25*, 567–580. <https://doi.org/10.1179/016164103101202002>
3. Caramelli, P.; Nitrini, R.; Maranhao, R.; Lourenço, A.C.G.; Damasceno, M.C.; Vinagre, C.; Caramelli, B. Increased apolipoprotein B serum concentration in Alzheimer's disease. *Acta Neurol. Scand.* **1999**, *100*, 61–63. <https://doi.org/10.1111/j.1600-0404.1999.tb00724.x>
4. Chen, H.; Du, Y.; Liu, S.; Ge, B.; Ji, Y.; Huang, G. Association between serum cholesterol levels and Alzheimer's disease in China: A case-control study. *Int. J. Food Sci. Nutr.* **2019**, *70*, 405–411. <https://doi.org/10.1080/09637486.2018.1508426>
5. Hoshino, T.; Kamino, K.; Matsumoto, M. Gene dose effect of the APOE- $\epsilon$ 4 allele on plasma HDL cholesterol level in patients with Alzheimer's disease. *Neurobiol. Aging* **2002**, *23*, 41–45. [https://doi.org/10.1016/S0197-4580\(01\)00252-4](https://doi.org/10.1016/S0197-4580(01)00252-4)
6. Kouzuki, M.; Nagano, M.; Suzuki, T.; Katsumata, Y.; Nakamura, S.; Takamura, A.; Urakami, K. Cerebrospinal fluid biomarkers of Alzheimer's disease are associated with carotid plaque score and hemodynamics in intra- and extra-cranial arteries on ultrasonography. *J. Clin. Neurosci.* **2018**, *49*, 32–36. <https://doi.org/10.1016/j.jocn.2017.12.006>
7. Kuo, Y.-M.; Emmerling, M.R.; Bisgaier, C.L.; Essenburg, A.D.; Lampert, H.C.; Drumm, D.; Roher, A.E. Elevated low-density lipoprotein in Alzheimer's disease correlates with brain A $\beta$  1–42 levels. *Biochem. Biophys. Res. Commun.* **1998**, *252*, 711–715. <https://doi.org/10.1006/bbrc.1998.9652>
8. Lehtonen, A.; Luutonen, S. High-density lipoprotein cholesterol levels of very old people in the diagnosis of dementia. *Age Ageing* **1986**, *15*, 267–270. <https://doi.org/10.1093/ageing/15.5.267>
9. Lesser, G.; Kandiah, K.; Libow, L.S.; Likourezos, A.; Breuer, B.; Marin, D.; Mohs, R.; Haroutunian, V.; Neufeld, R. Elevated serum total and LDL cholesterol in very old patients with Alzheimer's disease. *Dement. Geriatr. Cogn. Disord.* **2001**, *12*, 138–145. <https://doi.org/10.1159/000051248>
10. Macesic, M.; Lalic, N.; Kostic, V.; Jotic, A.; Lalic, K.; Stefanova, E.; Milicic, T.; Lukic, L.; Stanarcic Gajovic, J.; Krako, N. Impaired insulin sensitivity and secretion in patients with Alzheimer's disease: the relationship with other atherosclerosis risk factors. *Curr. Vasc. Pharmacol.* **2017**, *15*, 158–166. <https://doi.org/10.2174/1570161114666160905170644>
11. Mamo, J.C.L.; Jian, L.; James, A.P.; Flicker, L.; Esselmann, H.; Wiltfang, J. Plasma lipoprotein  $\beta$ -amyloid in subjects with Alzheimer's disease or mild cognitive impairment. *Ann. Clin. Biochem.* **2008**, *45*, 395–403. <https://doi.org/10.1258/acb.2008.007214>
12. Panza, F.; Solfrizzi, V.; Colacicco, A.M.; Basile, A.M.; D'Introno, A.; Capurso, C.; Sabba, M.; Capurso, S.; Capurso, A. Apolipoprotein E (APOE) polymorphism influences serum APOE levels in Alzheimer's disease patients and centenarians. *Neuroreport* **2003**, *14*, 605–608. <https://doi.org/10.1097/00001756-200303240-00016>
13. Paragh, G.; Balla, P.; Katona, E.; Seres, I.; Égerházi, A.; Degrell, I. Serum paraoxonase activity changes in patients with Alzheimer's disease and vascular dementia. *Eur. Arch. Psychiatry Clin. Neurosci.* **2002**, *252*, 63–67. <https://doi.org/10.1007/s004060200013>
14. Ryglewicz, D.; Rodo, M.; Kunicki, P.K.; Bednarska-Makaruk, M.; Graban, A.; Lojkowska, W.; Wehr, H. Plasma antioxidant activity and vascular dementia. *J. Neurol. Sci.* **2002**, *203*, 195–197. [https://doi.org/10.1016/S0022-510X\(02\)00290-3](https://doi.org/10.1016/S0022-510X(02)00290-3)
15. Scacchi, R.; De Bernardini, L.; Mantuano, E.; Vilardo, T.; Donini, L.M.; Ruggeri, M.; Gemma, A.T.; Pascone, R.; Corbo, R.M. DNA polymorphisms of apolipoprotein B and angiotensin I-converting enzyme genes and

- relationships with lipid levels in Italian patients with vascular dementia or Alzheimer's disease. *Dement. Geriatr. Cogn. Disord.* **1998**, *9*, 186–190. <https://doi.org/10.1159/000017045>
16. Shafagoj, Y.A.; Naffa, R.G.; El-Khateeb, M.S.; Abdulla, Y.L.; Al-Qaddoumi, A.A.; Khatib, F.A.; AL-Motassem, Y.F.; Al-Khateeb, E.M. APOE Gene polymorphism among Jordanian Alzheimer's patients with relation to lipid profile. *Neurosciences* **2018**, *23*, 29–34. <https://doi.org/10.17712/nsj.2018.1.20170169>
  17. Solfrizzi, V.; Panza, F.; D'introno, A.; Colacicco, A.M.; Capurso, C.; Basile, A.M.; Capurso, A. Lipoprotein (a), apolipoprotein E genotype, and risk of Alzheimer's disease. *J. Neurol. Neurosurg. Psychiatry* **2002**, *72*, 732–736. <https://doi.org/10.1136/jnnp.72.6.732>
  18. Tang, Y.; Li, Y.-M.; Zhang, M.; Chen, Y.-Q.; Sun, Q. ε3/4 genotype of the apolipoprotein E is associated with higher risk of Alzheimer's disease in patients with type 2 diabetes mellitus. *Gene* **2019**, *703*, 65–70. <https://doi.org/10.1016/j.gene.2019.03.024>
  19. Warren, M.W.; Hynan, L.S.; Weiner, M.F. Lipids and adipokines as risk factors for Alzheimer's disease. *J. Alzheimers Dis.* **2012**, *29*, 151–157. <https://doi.org/10.3233/JAD-2012-111385>
  20. Watanabe, T.; Miyazaki, A.; Katagiri, T.; Yamamoto, H.; Idei, T.; Iguchi, T. Relationship between serum insulin-like growth factor-1 levels and Alzheimer's disease and vascular dementia. *J. Am. Geriatr. Soc.* **2005**, *53*, 1748–1753. <https://doi.org/10.1111/j.1532-5415.2005.53524.x>
  21. Wehr, H.; Bednarska-Makaruk, M.; Lojkowska, W.; Graban, A.; Hoffman-Zacharska, D.; Kuczyńska-Zardzewialy, A.; Mrugala, J.; Rodo, M.; Bochyńska, A.; Sulek, A. Differences in risk factors for dementia with neurodegenerative traits and for vascular dementia. *Dement. Geriatr. Cogn. Disord.* **2006**, *22*, 1–7. <https://doi.org/10.1159/000092845>
  22. Wolf, H.; Hensel, A.; Arendt, T.; Kivipelto, M.; Winblad, B.; Gertz, H.-J. Serum lipids and hippocampal volume: the link to Alzheimer's disease? *Ann. Neurol. Off. J. Am. Neurol. Assoc. Child Neurol. Soc.* **2004**, *56*, 745–749. <https://doi.org/10.1002/ana.20289>
  23. Yamamoto, H.; Watanabe, T.; Miyazaki, A.; Katagiri, T.; Idei, T.; Iguchi, T.; Mimura, M.; Kamijima, K. High Prevalence of Chlamydia Pneumoniae Antibodies and Increased High-Sensitive C-Reactive Protein in Patients with Vascular Dementia. *J. Am. Geriatr. Soc.* **2005**, *53*, 583–589. <https://doi.org/10.1111/j.1532-5415.2005.53204.x>
  24. Yavuz, B.B.; Yavuz, B.; Halil, M.; Cankurtaran, M.; Ulger, Z.; Cankurtaran, E.S.; Aytemir, K.; Ariogul, S. Serum elevated gamma glutamyltransferase levels may be a marker for oxidative stress in Alzheimer's disease. *Int. Psychogeriatr.* **2008**, *20*, 815–823. <https://doi.org/10.1017/S1041610208006790>
  25. Kalman, J.; Kudchodkar, B.J.; Murray, K.; McConathy, W.J.; Juhasz, A.; Janka, Z.; Lacko, A.G. Evaluation of serum-lipid-related cardiovascular risk factors in Alzheimer's disease. *Dement. Geriatr. Cogn. Disord.* **1999**, *10*, 488–493. <https://doi.org/10.1159/000017195>
  26. Merched, A.; Xia, Y.; Visvikis, S.; Serot, J.M.; Siest, G. Decreased high-density lipoprotein cholesterol and serum apolipoprotein AI concentrations are highly correlated with the severity of Alzheimer's disease☆. *Neurobiol. Aging* **2000**, *21*, 27–30. [https://doi.org/10.1016/S0197-4580\(99\)00103-7](https://doi.org/10.1016/S0197-4580(99)00103-7)
  27. Lesser, G.T.; Haroutunian, V.; Purohit, D.P.; Beeri, M.S.; Schmeidler, J.; Honkanen, L.; Neufeld, R.; Libow, L.S. Serum lipids are related to Alzheimer's pathology in nursing home residents. *Dement. Geriatr. Cogn. Disord.* **2009**, *27*, 42–49. <https://doi.org/10.1159/000189268>
  28. Sun, X.; Shao, H.; Yu, D.; Wang, D. Analysis of correlation between insulin resistance, blood lipids and Alzheimer's disease. *Wei Sheng Yan Jiu/Journal of Hygiene Research* **2010**, *5*, 573–575.
  29. Presečki, P.; Mück-Šeler, D.; Mimica, N.; Pivac, N.; Mustapić, M.; Stipčević, T.; Folnegović Šmalc, V. Serum lipid levels in patients with Alzheimer's disease. *Coll. Antropol.* **2011**, *35*, 115–120. [https://doi.org/10.1016/S0197-4580\(99\)00103-7](https://doi.org/10.1016/S0197-4580(99)00103-7)
  30. Parnowski, T.; Kaluza, B. Metabolic syndrome and cognitive dysfunction in the old age. *Psychiatr. Pol.* **2013**, *47*: 6, 1087–1099.
  31. Grossi, M.F.; Carvalho, M. das G.; Silveira, J.N.; Gonçalves, G.S.; Gomes, K.B.; Bicalho, M.A.; Silva, I. de F.O. OxLDL plasma levels in patients with Alzheimer's disease. *Arq. Neuropsiquiatr.* **2018**, *76*, 241–246. <https://doi.org/10.1590/0004-282x20180012>
  32. Agarwal, R.; Talwar, P.; Kushwaha, S.S.; Tripathi, C.B.; Kukreti, R. Effect of apolipoprotein E (APO E) polymorphism on leptin in Alzheimer's disease. *Ann. Indian Acad. Neurol.* **2015**, *18*, 320. <https://doi.org/10.4103/0972-2327.157255>

33. Alam, R.; Tripathi, M.; Mansoori, N.; Parveen, S.; Luthra, K.; Lakshmy, R.; Sharma, S.; Arulselvi, S.; Mukhopadhyay, A.K. Synergistic epistasis of paraoxonase 1 (rs662 and rs85460) and apolipoprotein E4 genes in pathogenesis of Alzheimer's disease and vascular dementia. *Am. J. Alzheimers Dis. Dementias*® **2014**, *29*, 769–776. <https://doi.org/10.1177/1533317514539541>
34. Cankurtaran, M.; Yavuz, B.B.; Halil, M.; Dagli, N.; Cankurtaran, E.S.; Ariogul, S. Are serum lipid and lipoprotein levels related to dementia? *Arch. Gerontol. Geriatr.* **2005**, *41*, 31–39. <https://doi.org/10.1016/j.archger.2004.10.008>
35. Chang, L.; Wang, Y.; Ji, H.; Dai, D.; Xu, X.; Jiang, D.; Hong, Q.; Ye, H.; Zhang, X.; Zhou, X. Elevation of peripheral BDNF promoter methylation links to the risk of Alzheimer's disease. *PloS One* **2014**, *9*. <https://doi.org/10.1371/journal.pone.0110773>
36. Duan, D.; Ling, Y.; Zhou, Y. A clinical study on the serum triglyceride and total cholesterol of patients with vascular dementia and Alzheimer's disease. *Chin. J. Prev. Control Chronic Dis.* **2009**, *2*, 153-154.
37. Han, J.F.; Qu, Q.M.; Guo, F.; Yang, J.B.; Qiao, J.; Wu, C.B.; Ma, A.Q. Correlation between the levels of serum lipids and the onset of disease in patients with Alzheimer disease: 1:1 paired observation. *Chinese Journal of Clinical Rehabilitation* **2005**, *9*, 32-34.
38. Li, W. Relationship between changes of blood lipid metabolism and disease in patients with Alzheimer's disease. *Medical Information* **2014**, *27*.
39. Liu, J.H.; Chen, Z.L. Observation of serum cholesterol IL-6 and VitB12 levels in Alzheimer's disease or vascular dementia patients. *J. Jiangsu Univ. Med. Ed.* **2006**, *1*, 48–50.
40. Liu, Z.S. Study of lipid metabolism in patients with sporadic Alzheimer's disease. *China J Nerv Ment Dis* **2005**, *31*, 383-384.
41. Raygani, A.V.; Rahimi, Z.; Kharazi, H.; Tavilani, H.; Pourmotabbed, T. Association between apolipoprotein E polymorphism and serum lipid and apolipoprotein levels with Alzheimer's disease. *Neurosci. Lett.* **2006**, *408*, 68–72. <https://doi.org/10.1016/j.neulet.2006.08.048>
42. Shim, Y.S. Elevated remnant lipoprotein cholesterol in patients with Alzheimer's disease and vascular dementia: a pilot study. *Dementia and Neurocognitive Disorders*, **2010**, *7*.
43. Singh, N.K.; Chhillar, N.; Banerjee, B.D.; Bala, K.; Mukherjee, A.K.; Mustafa, M.D.; Mitrabasu Gene-environment interaction in Alzheimer's disease. *Am. J. Alzheimers Dis. Dementias*® **2012**, *27*, 496–503. <https://doi.org/10.1177/1533317512456067>
44. Sun, Y.L. Observation of blood lipid levels in patients with Alzheimer's disease. *China J Misdiagn* **2006**, *23*, 4542-4544.
45. Vasantharekha, R.; Priyanka, H.P.; Swarnalingam, T.; Srinivasan, A.V.; ThyagaRajan, S. Interrelationship between Mini-Mental State Examination scores and biochemical parameters in patients with mild cognitive impairment and Alzheimer's disease. *Geriatr. Gerontol. Int.* **2017**, *17*, 1737–1745. <https://doi.org/10.1111/ggi.12957>
46. Wada, H. Analyses of serum concentrations of apolipoproteins in the demented elderly. *Intern. Med.* **2000**, *39*, 220–222. <https://doi.org/10.2169/internalmedicine.39.220>
47. Wang, C.Y.; Fang, Y-y.; Chu, W-z.; Wu, Q.; Du, H.; Han, J.; Qian, C-y. A clinical study of Alzheimer's disease and vascular dementia in serum cholesterol, Vit B12, and folate acid. *Chinese Journal of Nervous and mental disease* **2005**, *31*:3, 188-191.
48. Wang, H. Study on the combining assay of total antioxidant status, high sensitive Creactive protein and serum lipids in the diagnosis of Alzheimer's disease. *Laboratory Medicine* **2006**, *21*.
49. Wang, R.; Chen, Z.; Fu, Y.; Wei, X.; Liao, J.; Liu, X.; He, B.; Xu, Y.; Zou, J.; Yang, X Plasma cystatin c and high-density lipoprotein are important biomarkers of Alzheimer's disease and vascular dementia: a cross-sectional study. *Frontiers in aging neuroscience* **2017**, *9*. <https://doi.org/10.3389/fnagi.2017.00026>
50. Wang, X.H.; Zhang, N. Changes of serum levels of thyroid hormones and blood lipid in patients with varying degrees of Alzheimer's disease and related risk factors. *Journal of Clinical Medicine in Practice* **2016**, *5*, 32-35.
51. Watanabe, T.; Koba, S.; Kawamura, M.; Itokawa, M.; Idei, T.; Nakagawa, Y.; Iguchi, T.; Katagiri, T. Small dense low-density lipoprotein and carotid atherosclerosis in relation to vascular dementia. *Metabolism* **2004**, *53*, 476–482. <https://doi.org/10.1016/j.metabol.2003.11.020>
52. 108. Xiao, Z.; Wang, J.; Chen, W.; Wang, P.; Zeng, H.; Chen, W. Association studies of several cholesterol-related genes (ABCA1, CETP and LIPC) with serum lipids and risk of Alzheimer's disease. *Lipids Health Dis.* **2012**, *11*, 163. <https://doi.org/10.1186/1476-511X-11-163>

53. Xiao hong, W.; Shuyun, Z.; Xiao zhong, Y. Relationship between lipid disorders and carotid artery atherosclerosis. *Mod. J. Integr. Tradit. Chin. West. Med.* **2010**, *17*, 2096-2097
54. Yang, C.Z.; Tian, J.Z.; Zhong, J. Changes of blood lipid in mild cognitive impairment and Alzheimer's disease. *Chinese Journal of Gerontology* **2007**, *6*, 545-548.
55. Yu, Z.; Li, W.; Hou, D.; Zhou, L.; Deng, Y.; Tian, M.; Feng, X. Relationship between adiponectin gene polymorphisms and late-onset Alzheimer's disease. *PloS One* **2015**, *10*, 4. <https://doi.org/10.1371/journal.pone.0125186>
56. Yuan, Y.G.; Ye, Q.; Chen, Y.; Li, H.L.; Lu, R.; Mei, G.; Chen, Z.; Li, Y.; Gu, X.; Liu, Y.; Zhang, S.; Wu, R. A study of serum lipid concentrations and apolipoprotein E genotype among patients with senile depression and alzhemier disease. *Chin. Gen. Pract.* **2006**, *9*: 2, 106–108.
57. Yue, Y.H.; Zhou, X.H.; Palida, A.B. Analysis of low density lipoprotein receptor-related protein gene 766C/T polymorphism and the levels of serum lipids in patients with Alzheimer's disease in Xinjiang Uyghurs. *China J Psychiatry* **2009**, *3*, 129-133.
58. Zengi, O.; Karakas, A.; Ergun, U.; Senes, M.; Inan, L.; Yucel, D. Urinary 8-hydroxy-2'-deoxyguanosine level and plasma paraoxonase 1 activity with Alzheimer's disease. *Clin. Chem. Lab. Med.* **2012**, *50*, 529–534. <https://doi.org/10.1515/cclm.2011.792>
59. Zhao, Z.; Zhou, H.; Peng, Y.; Qiu, C.H.; Sun, Q.Y.; Wang, F.; Xie, H.N. Expression and significance of plasma 3-NT and ox-LDL in patients with Alzheimer's. *Genet. Mol. Res.* **2014**, *13*, 8428–8435. <https://doi.org/10.4238/2014.October.20.19>
60. Zheng, J.; Yan, H.; Shi, L.; Kong, Y.; Zhao, Y.; Xie, L.; Li, J.; Huang, M.; Li, J.; Zhao, S. The CYP19A1 rs3751592 variant confers susceptibility to Alzheimer disease in the Chinese Han population. *Medicine (Baltimore)* **2016**, *95*. <https://doi.org/10.1097/MD.0000000000004742>
61. Zhong, X.; Yinglan, L.I.; Can, D.U.; Guofeng, L.I.; Hongjuan, L.I.; Zhu, A. Changes in serum homocysteine and its correlation with altitude, folacin and high-sensitivity C-reactive protein in Tibetan patients with mild-to-moderate Alzheimer's disease at different altitudes. *Chin. J. Geriatr.* **2016**, *35*, 934–938. <https://doi.org/10.1515/CCLM.2011.792>
62. Zhou, T. Comparative study on serum inflammatory cytokines and blood lipids in Alzheimer's disease and varcular dementia. *Medical Journal of Chinese People's Health* **2015**, *11*, 4-5.
63. Zhu, J.Y. Comparison of serum lipids, serum CRP, Hcy and sIL-6R in patients with Alzheimer's disease and those of the same age. *Pract Geriatr* **2007**, *21*.
64. Papassotiropoulos, A.; Lütjohann, D.; Bagli, M.; Locatelli, S.; Jessen, F.; Buschfort, R.; Ptok, U.; Björkhem, I.; Von Bergmann, K.; Heun, R. 24S-hydroxycholesterol in cerebrospinal fluid is elevated in early stages of dementia. *J. Psychiatr. Res.* **2002**, *36*, 27–32. [https://doi.org/10.1016/S0022-3956\(01\)00050-4](https://doi.org/10.1016/S0022-3956(01)00050-4)
65. Martínez-Morillo, E.; Hansson, O.; Atagi, Y.; Bu, G.; Minthon, L.; Diamandis, E.P.; Nielsen, H.M. Total apolipoprotein E levels and specific isoform composition in cerebrospinal fluid and plasma from Alzheimer's disease patients and controls. *Acta Neuropathol. (Berl.)* **2014**, *127*, 633–643. <https://doi.org/10.1007/s00401-014-1266-2>
66. Kölsch, H.; Lütjohann, D.; Jessen, F.; Urbach, H.; Von Bergmann, K.; Maier, W.; Heun, R. Polymorphism in neuropeptide Y influences CSF cholesterol levels but is no major risk factor of Alzheimer's disease. *J. Neural Transm.* **2006**, *113*, 231–238. <https://doi.org/10.1007/s00702-005-0319-z>
67. Kölsch, H.; Lütjohann, D.; Jessen, F.; Popp, J.; Hentschel, F.; Kelemen, P.; Schmitz, S.; Maier, W.; Heun, R. CYP46A1 variants influence Alzheimer's disease risk and brain cholesterol metabolism. *Eur. Psychiatry* **2009**, *24*, 183–190. <https://doi.org/10.1016/j.eurpsy.2008.12.005>
68. Kölsch, H.; Lütjohann, D.; Jessen, F.; Popp, J.; Hentschel, F.; Kelemen, P.; Friedrichs, S.; Maier, T.A.W.; Heun, R. RXRA gene variations influence Alzheimer's disease risk and cholesterol metabolism. *J. Cell. Mol. Med.* **2009**, *13*, 589–598. <https://doi.org/10.1111/j.1582-4934.2009.00383.x>
69. Kölsch, H.; Heun, R.; Jessen, F.; Popp, J.; Hentschel, F.; Maier, W.; Lütjohann, D. Alterations of cholesterol precursor levels in Alzheimer's disease. *Biochim. Biophys. Acta BBA - Mol. Cell Biol. Lipids* **2010**, *1801*, 945–950. <https://doi.org/10.1016/j.bbalip.2010.03.001>
70. Qureischie, H.; Heun, R.; Lütjohann, D.; Popp, J.; Jessen, F.; Ledschbor-Frahnert, C.; Thiele, H.; Maier, W.; Hentschel, F.; Kelemen, P.; et al. CETP polymorphisms influence cholesterol metabolism but not Alzheimer's disease risk. *Brain Res.* **2008**, *1232*, 1–6. <https://doi.org/10.1016/j.brainres.2008.07.047>

71. Mateos, L.; Ismail, M.-A.-M.; Gil-Bea, F.-J.; Leoni, V.; Winblad, B.; Björkhem, I.; Cedazo-Mínguez, A. Upregulation of Brain Renin Angiotensin System by 27-Hydroxycholesterol in Alzheimer's Disease. *J. Alzheimers Dis.* **2011**, *24*, 669–679. <https://doi.org/10.3233/JAD-2011-101512>
72. Wollmer, M.A.; Streffer, J.R.; Tsolaki, M.; Grimaldi, L.M.E.; Lütjohann, D.; Thal, D.; von Bergmann, K.; Nitsch, R.M.; Hock, C.; Papassotiropoulos, A. Genetic association of acyl-coenzyme A: cholesterol acyltransferase with cerebrospinal fluid cholesterol levels, brain amyloid load, and risk for Alzheimer's disease. *Mol. Psychiatry* **2003**, *8*, 635–638. <https://doi.org/10.1038/sj.mp.4001296>
73. Wollmer, M.A.; Streffer, J.R.; Lütjohann, D.; Tsolaki, M.; Iakovidou, V.; Hegi, T.; Pasch, T.; Jung, H.H.; Bergmann, K. von; Nitsch, R.M.; et al. ABCA1 modulates CSF cholesterol levels and influences the age at onset of Alzheimer's disease. *Neurobiol. Aging* **2003**, *24*, 421–426. [https://doi.org/10.1016/S0197-4580\(02\)00094-5](https://doi.org/10.1016/S0197-4580(02)00094-5)
74. Shafaati, M.; Solomon, A.; Kivipelto, M.; Björkhem, I.; Leoni, V. Levels of ApoE in cerebrospinal fluid are correlated with Tau and 24S-hydroxycholesterol in patients with cognitive disorders. *Neurosci. Lett.* **2007**, *425*, 78–82. <https://doi.org/10.1016/j.neulet.2007.08.014>
75. Schönknecht, P.; Lütjohann, D.; Pantel, J.; Bardenheuer, H.; Hartmann, T.; von Bergmann, K.; Beyreuther, K.; Schröder, J. Cerebrospinal fluid 24S-hydroxycholesterol is increased in patients with Alzheimer's disease compared to healthy controls. *Neurosci. Lett.* **2002**, *324*, 83–85. [https://doi.org/10.1016/S0304-3940\(02\)00164-7](https://doi.org/10.1016/S0304-3940(02)00164-7)
76. Popp, J.; Lewczuk, P.; Kölsch, H.; Meichsner, S.; Maier, W.; Kornhuber, J.; Jessen, F.; Lütjohann, D. Cholesterol metabolism is associated with soluble amyloid precursor protein production in Alzheimer's disease. *J. Neurochem.* **2012**, *123*, 310–316. <https://doi.org/10.1111/j.1471-4159.2012.07893.x>
77. Popp, J.; Meichsner, S.; Kölsch, H.; Lewczuk, P.; Maier, W.; Kornhuber, J.; Jessen, F.; Lütjohann, D. Cerebral and extracerebral cholesterol metabolism and CSF markers of Alzheimer's disease. *Biochem. Pharmacol.* **2013**. <https://doi:10.1016/j.neulet.2007.08.014>.
78. Vanmierlo, T.; Popp, J.; Kölsch, H.; Friedrichs, S.; Jessen, F.; Stoffel-Wagner, B.; Bertsch, T.; Hartmann, T.; Maier, W.; Bergmann, K. von; et al. The plant sterol brassicasterol as additional CSF biomarker in Alzheimer's disease. *Acta Psychiatr. Scand.* **2011**, *124*, 184–192. <https://doi.org/10.1111/j.1600-0447.2011.01713.x>
79. Leoni, V.; Caccia, C. Potential diagnostic applications of side chain oxysterols analysis in plasma and cerebrospinal fluid. *Biochem. Pharmacol.* **2013**, *86*, 26–36. <https://doi.org/10.1016/j.bcp.2013.03.015>
80. Li, G.; Shofer, J.B.; Kukull, W.A.; Peskind, E.R.; Tsuang, D.W.; Breitner, J.C.; McCormick, W.; Bowen, J.D.; Teri, L.; Schellenberg, G.D. Serum cholesterol and risk of Alzheimer disease: a community-based cohort study. *Neurology* **2005**, *65*, 1045–1050. <https://doi.org/10.1212/01.wnl.0000178989.87072.11>
81. Solomon, A.; Kivipelto, M.; Wolozin, B.; Zhou, J.; Whitmer, R.A. Midlife serum cholesterol and increased risk of Alzheimer's and vascular dementia three decades later. *Dement. Geriatr. Cogn. Disord.* **2009**, *28*, 75–80. <https://doi.org/10.1159/000231980>
82. Mielke, M.M.; Zandi, P.P.; Shao, H.; Waern, M.; Östling, S.; Guo, X.; Björkelund, C.; Lissner, L.; Skoog, I.; Gustafson, D.R. The 32-year relationship between cholesterol and dementia from midlife to late life. *Neurology* **2010**, *75*, 1888–1895. <https://doi.org/10.1212/WNL.0b013e3181feb2bf>
83. Huang, C.-C.; Chung, C.-M.; Leu, H.-B.; Lin, L.-Y.; Chiu, C.-C.; Hsu, C.-Y.; Chiang, C.-H.; Huang, P.-H.; Chen, T.-J.; Lin, S.-J. Diabetes mellitus and the risk of Alzheimer's disease: a nationwide population-based study. *PloS One* **2014**, *9*. <https://doi.org/10.1371/journal.pone.0087095>
84. Kivipelto, M.; Ngandu, T.; Fratiglioni, L.; Viitanen, M.; Kåreholt, I.; Winblad, B.; Helkala, E.-L.; Tuomilehto, J.; Soininen, H.; Nissinen, A. Obesity and vascular risk factors at midlife and the risk of dementia and Alzheimer disease. *Arch. Neurol.* **2005**, *62*, 1556–1560. <https://doi.org/10.1001/archneur.62.10.1556>
85. Kimm, H.; Lee, P.H.; Shin, Y.J.; Park, K.S.; Jo, J.; Lee, Y.; Kang, H.C.; Jee, S.H. Mid-life and late-life vascular risk factors and dementia in Korean men and women. *Arch. Gerontol. Geriatr.* **2011**, *52*, e117–e122. <https://doi.org/10.1016/j.archger.2010.09.004>
86. Kivipelto, M.; Helkala, E.-L.; Laakso, M.P.; Hänninen, T.; Hallikainen, M.; Alhainen, K.; Iivonen, S.; Mannermaa, A.; Tuomilehto, J.; Nissinen, A. Apolipoprotein E ε4 allele, elevated midlife total cholesterol level, and high midlife systolic blood pressure are independent risk factors for late-life Alzheimer disease. *Ann. Intern. Med.* **2002**, *137*, 149–155. <https://doi.org/10.7326/0003-4819-137-3-200208060-00006>

87. Hayden, K.M.; Zandi, P.P.; Lyketsos, C.G.; Khachaturian, A.S.; Bastian, L.A.; Charoonruk, G.; Tschanz, J.T.; Norton, M.C.; Pieper, C.F.; Munger, R.G. Vascular risk factors for incident Alzheimer disease and vascular dementia: the Cache County study. *Alzheimer Dis. Assoc. Disord.* **2006**, *20*, 93–100. <https://doi.org/10.1097/01.wad.0000213814.43047.86>
88. Notkola IL.; Sulkava R.; Pekkanen J.; Erkinjuntti T.; Ehnholm C.; Kivinen P.; Tuomilehto J.; Nissinen. A Serum total cholesterol, apolipoprotein E epsilon 4 allele, and Alzheimer's disease. *Neuroepidemiology* **1998**, *17*, 14-20. <https://doi.org/10.1159/000026149>
89. Rönnemaa, E.; Zethelius, B.; Lannfelt, L.; Kilander, L. Vascular risk factors and dementia: 40-year follow-up of a population-based cohort. *Dement. Geriatr. Cogn. Disord.* **2011**, *31*, 460–466. <https://doi.org/10.1159/000330020>
90. Wang, K.-C.; Woung, L.-C.; Tsai, M.-T.; Liu, C.-C.; Su, Y.-H.; Li, C.-Y. Risk of Alzheimer's disease in relation to diabetes: a population-based cohort study. *Neuroepidemiology* **2012**, *38*, 237–244. <https://doi.org/10.1159/000337428>
91. Lieb W; Beiser AS; Vasan RS; Tan ZS; Au R; Harris TB; Roubenoff R; Auerbach S; DeCarli C; Wolf PA; et al. Association of plasma leptin levels with incident Alzheimer disease and MRI measures of brain aging. *JAMA* **2009**, *302*, 2565-2572. <https://doi.org/10.1001/jama.2009.1836>
92. Dal Forno, G.; Palermo, M.T.; Donohue, J.E.; Karagiozis, H.; Zonderman, A.B.; Kawas, C.H. Depressive symptoms, sex, and risk for Alzheimer's disease. *Ann. Neurol.* **2005**, *57*, 381–387. <https://doi.org/10.1002/ana.20405>
93. Forti, P.; Pisacane, N.; Rietti, E.; Lucicesare, A.; Olivelli, V.; Mariani, E.; Mecocci, P.; Ravaglia, G. Metabolic syndrome and risk of dementia in older adults. *J. Am. Geriatr. Soc.* **2010**, *58*, 487–492. <https://doi.org/10.1111/j.1532-5415.2010.02731.x>
94. Raffaitin, C.; Gin, H.; Empana, J.-P.; Helmer, C.; Berr, C.; Tzourio, C.; Portet, F.; Dartigues, J.-F.; Alperovitch, A.; Barberger-Gateau, P. Metabolic syndrome and risk for incident Alzheimer's disease or vascular dementia: the Three-City Study. *Diabetes Care* **2009**, *32*, 169–174. <https://doi.org/10.2337/dc08-0272>
95. Muller, M.; Tang, M.-X.; Schupf, N.; Manly, J.J.; Mayeux, R.; Luchsinger, J.A. Metabolic syndrome and dementia risk in a multiethnic elderly cohort. *Dement. Geriatr. Cogn. Disord.* **2007**, *24*, 185–192. <https://doi.org/10.1159/000105927>
